# Supplementary material for: Studies of a linear single-molecule magnet
Source: Royal Society of Chemistry journal article supplement (doi:10.1039/b713163a), 2007-01-01
Supplement: b713163a.pdf [file b713163a.pdf]

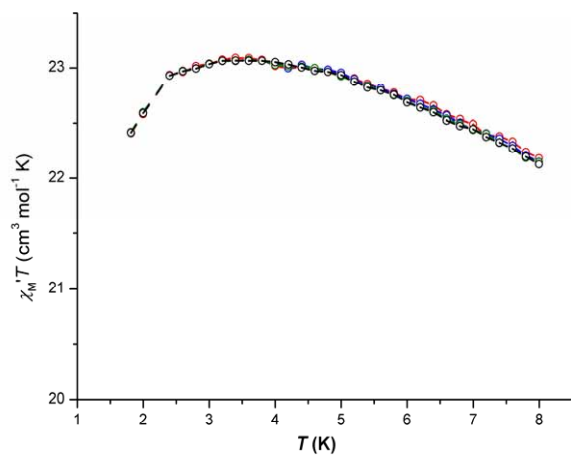

Figure S11: In-phase ( $\chi_M'$ , plotted as  $\chi_M' T$  versus  $T$ ) ac susceptibility for complex **1**.

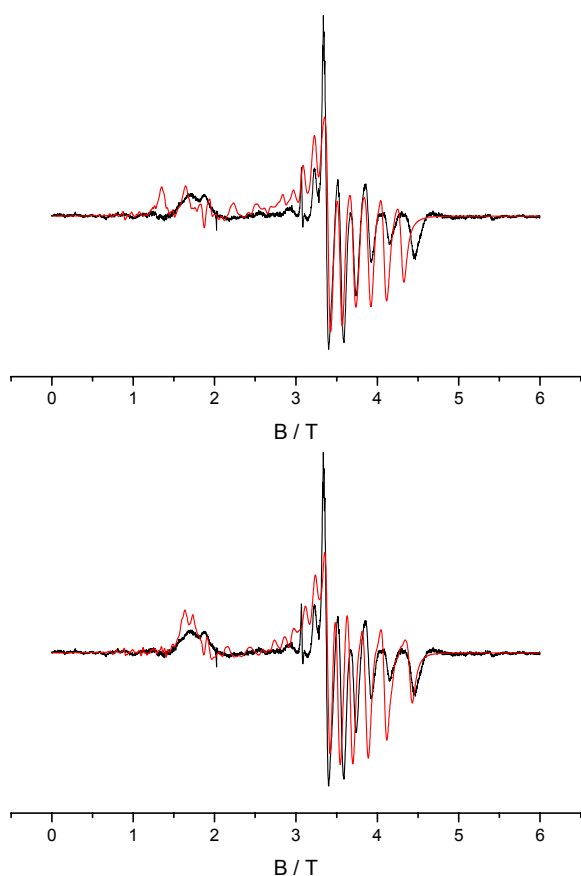

Fig S12. W-band EPR spectra of restrained polycrystalline sample of **1** at 10 K (black), with simulations based on axial SEL Hamiltonian (1) with (i)  $D = -0.14 \text{ cm}^{-1}$ ,  $B_4^0 = 0$ , and (ii)  $D = -0.14 \text{ cm}^{-1}$ ,  $B_4^0 = +1.5 \times 10^{-5} \text{ cm}^{-1}$ . Both models use  $g_{\text{iso}} = 2.06$ .
